# Supplementary material
Source: PubMed Central journal article supplement (PMC6066345)
Supplement: EHP2175.s001.acco.pdf [file EHP2175.s001.acco.pdf]

**Note to readers with disabilities:** *EHP* strives to ensure that all journal content is accessible to all readers. However, some figures and Supplemental Material published in *EHP* articles may not conform to [508 standards](#) due to the complexity of the information being presented. If you need assistance accessing journal content, please contact [ehp508@niehs.nih.gov](mailto:ehp508@niehs.nih.gov). Our staff will work with you to assess and meet your accessibility needs within 3 working days.

### **Supplemental Material**

#### **Metal Concentrations in e-Cigarette Liquid and Aerosol Samples: The Contribution of Metallic Coils**

Pablo Olmedo, Walter Goessler, Stefan Tanda, Maria Grau-Perez, Stephanie Jarmul, Angela Aherrera, Rui Chen, Markus Hilpert, Joanna E. Cohen, Ana Navas-Acien, and Ana M. Rule

#### **Table of Contents**

**Table S1.** Median concentrations of the propylene glycol and glycerin blanks ( $\mu\text{g}/\text{kg}$ ).

**Figure S1.** Correlations between metals in dispenser samples. All metals shown in Figure 1 are shown here. The diagonal panel shows the histograms of the  $\log_{10}$ -transformed distribution of each metal. The upper panel represents the Spearman pairwise correlation coefficients between metals. The axes indicate the  $\log_{10}$  metal concentrations values that are represented in the histograms. Correlations  $\geq 0.50$  were bolded.

**Table S1.** Median concentrations of the propylene glycol and glycerin blanks ( $\mu\text{g}/\text{kg}$ ).

|           | <b>E-liquid blanks (n=6)</b> | <b>Aerosol blanks (n=3)</b> |
|-----------|------------------------------|-----------------------------|
| <b>Al</b> | 39.4                         | 40.9                        |
| <b>As</b> | 23.3                         | 17.9                        |
| <b>Cd</b> | <0.1                         | <0.1                        |
| <b>Cr</b> | 12.0                         | 13.5                        |
| <b>Cu</b> | <1.0                         | <1.0                        |
| <b>Fe</b> | 39.6                         | 41.5                        |
| <b>Mn</b> | <1.0                         | <1.0                        |
| <b>Ni</b> | 5.3                          | 2.9                         |
| <b>Pb</b> | <0.2                         | <0.2                        |
| <b>Sb</b> | 1.0                          | 1.0                         |
| <b>Sn</b> | 0.2                          | <0.1                        |
| <b>Ti</b> | 37.5                         | 37.9                        |
| <b>U</b>  | <0.1                         | <0.1                        |
| <b>W</b>  | 1.2                          | 1.1                         |
| <b>Zn</b> | 5.1                          | 184.6                       |

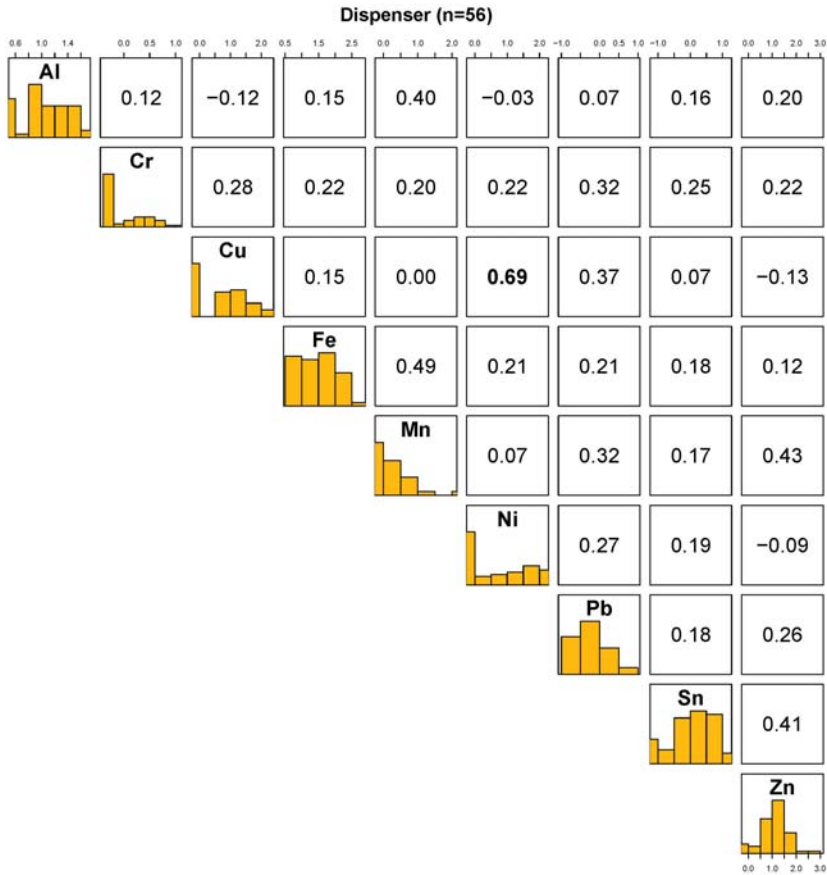

**Figure S1.** Correlations between metals in dispenser samples. All metals shown in Figure 1 are shown here. The diagonal panel shows the histograms of the log<sub>10</sub>-transformed distribution of each metal. The upper panel represents the Spearman pairwise correlation coefficients between metals. The axes indicate the log<sub>10</sub> metal concentrations values that are represented in the histograms. Correlations  $\geq 0.50$  were bolded.
